# Supplementary material for: Detection of Cistanches Herba (Rou Cong Rong) Medicinal Products Using Species-Specific Nucleotide Signatures
Source: PubMed Central journal article supplement (PMC6242781; doi:10.3389/fpls.2018.01643), 2018-11-13
Supplement: Image_1.pdf [file Image_1.pdf]

|                                  |                                                                                                                                                                                                                                                   |       |
|----------------------------------|---------------------------------------------------------------------------------------------------------------------------------------------------------------------------------------------------------------------------------------------------|-------|
| Orbanche coerulescens AY209235   | C A C A T C G C G T C G C C C T C C C T C C C G T C C C T A C G G G G C G T G T T T T G G T G G G G C G G A T A A T G G C C T C C C G T G C A C A A C A A T G T G C G G C T G G T C Y A A A T G C G A A C C C G C G G G C G A C T C A C G T C A C | [120] |
| Orbanche coerulescens XRL2       | .                                                                                                                                                                                                                                                 | [120] |
| Orbanche coerulescens KY218643   | .                                                                                                                                                                                                                                                 | [120] |
| Orbanche coerulescens KY513935   | .                                                                                                                                                                                                                                                 | [120] |
| Orbanche coerulescens JF915391   | .                                                                                                                                                                                                                                                 | [120] |
| Orbanche coerulescens PS2006MT01 | .                                                                                                                                                                                                                                                 | [120] |
| Orbanche coerulescens JF915382   | .                                                                                                                                                                                                                                                 | [120] |
| Orbanche coerulescens XRLD3      | .                                                                                                                                                                                                                                                 | [120] |
| Orbanche coerulescens MG979752   | G . . . . . T . . . . . A . . . . .                                                                                                                                                                                                               | [120] |
| Orbanche coerulescens AY881142   | .                                                                                                                                                                                                                                                 | [120] |
| Orbanche coerulescens XRLD5      | .                                                                                                                                                                                                                                                 | [120] |
| Orbanche coerulescens AY209235   | G A C C A G T G G T G G T T G A A T C T T C A A C T C T C G T C T G T C G T G T C G G A T G G T G T T G C T T G T T G G G C T C T A T T A T A G A C C C A T A G G C A C G A G C T G C T T G T G C T T T C G A C T G                               | [226] |
| Orbanche coerulescens XRL2       | .                                                                                                                                                                                                                                                 | [226] |
| Orbanche coerulescens KY218643   | .                                                                                                                                                                                                                                                 | [226] |
| Orbanche coerulescens KY513935   | .                                                                                                                                                                                                                                                 | [226] |
| Orbanche coerulescens JF915391   | .                                                                                                                                                                                                                                                 | [226] |
| Orbanche coerulescens PS2006MT01 | .                                                                                                                                                                                                                                                 | [226] |
| Orbanche coerulescens JF915382   | .                                                                                                                                                                                                                                                 | [226] |
| Orbanche coerulescens XRLD3      | .                                                                                                                                                                                                                                                 | [226] |
| Orbanche coerulescens MG979752   | .                                                                                                                                                                                                                                                 | [226] |
| Orbanche coerulescens AY881142   | .                                                                                                                                                                                                                                                 | [226] |
| Orbanche coerulescens XRLD5      | .                                                                                                                                                                                                                                                 | [226] |
