# Supplementary material for: Detection of Cistanches Herba (Rou Cong Rong) Medicinal Products Using Species-Specific Nucleotide Signatures
Source: PubMed Central journal article supplement (PMC6242781; doi:10.3389/fpls.2018.01643), 2018-11-13
Supplement: Image_2.pdf [file Image_2.pdf]

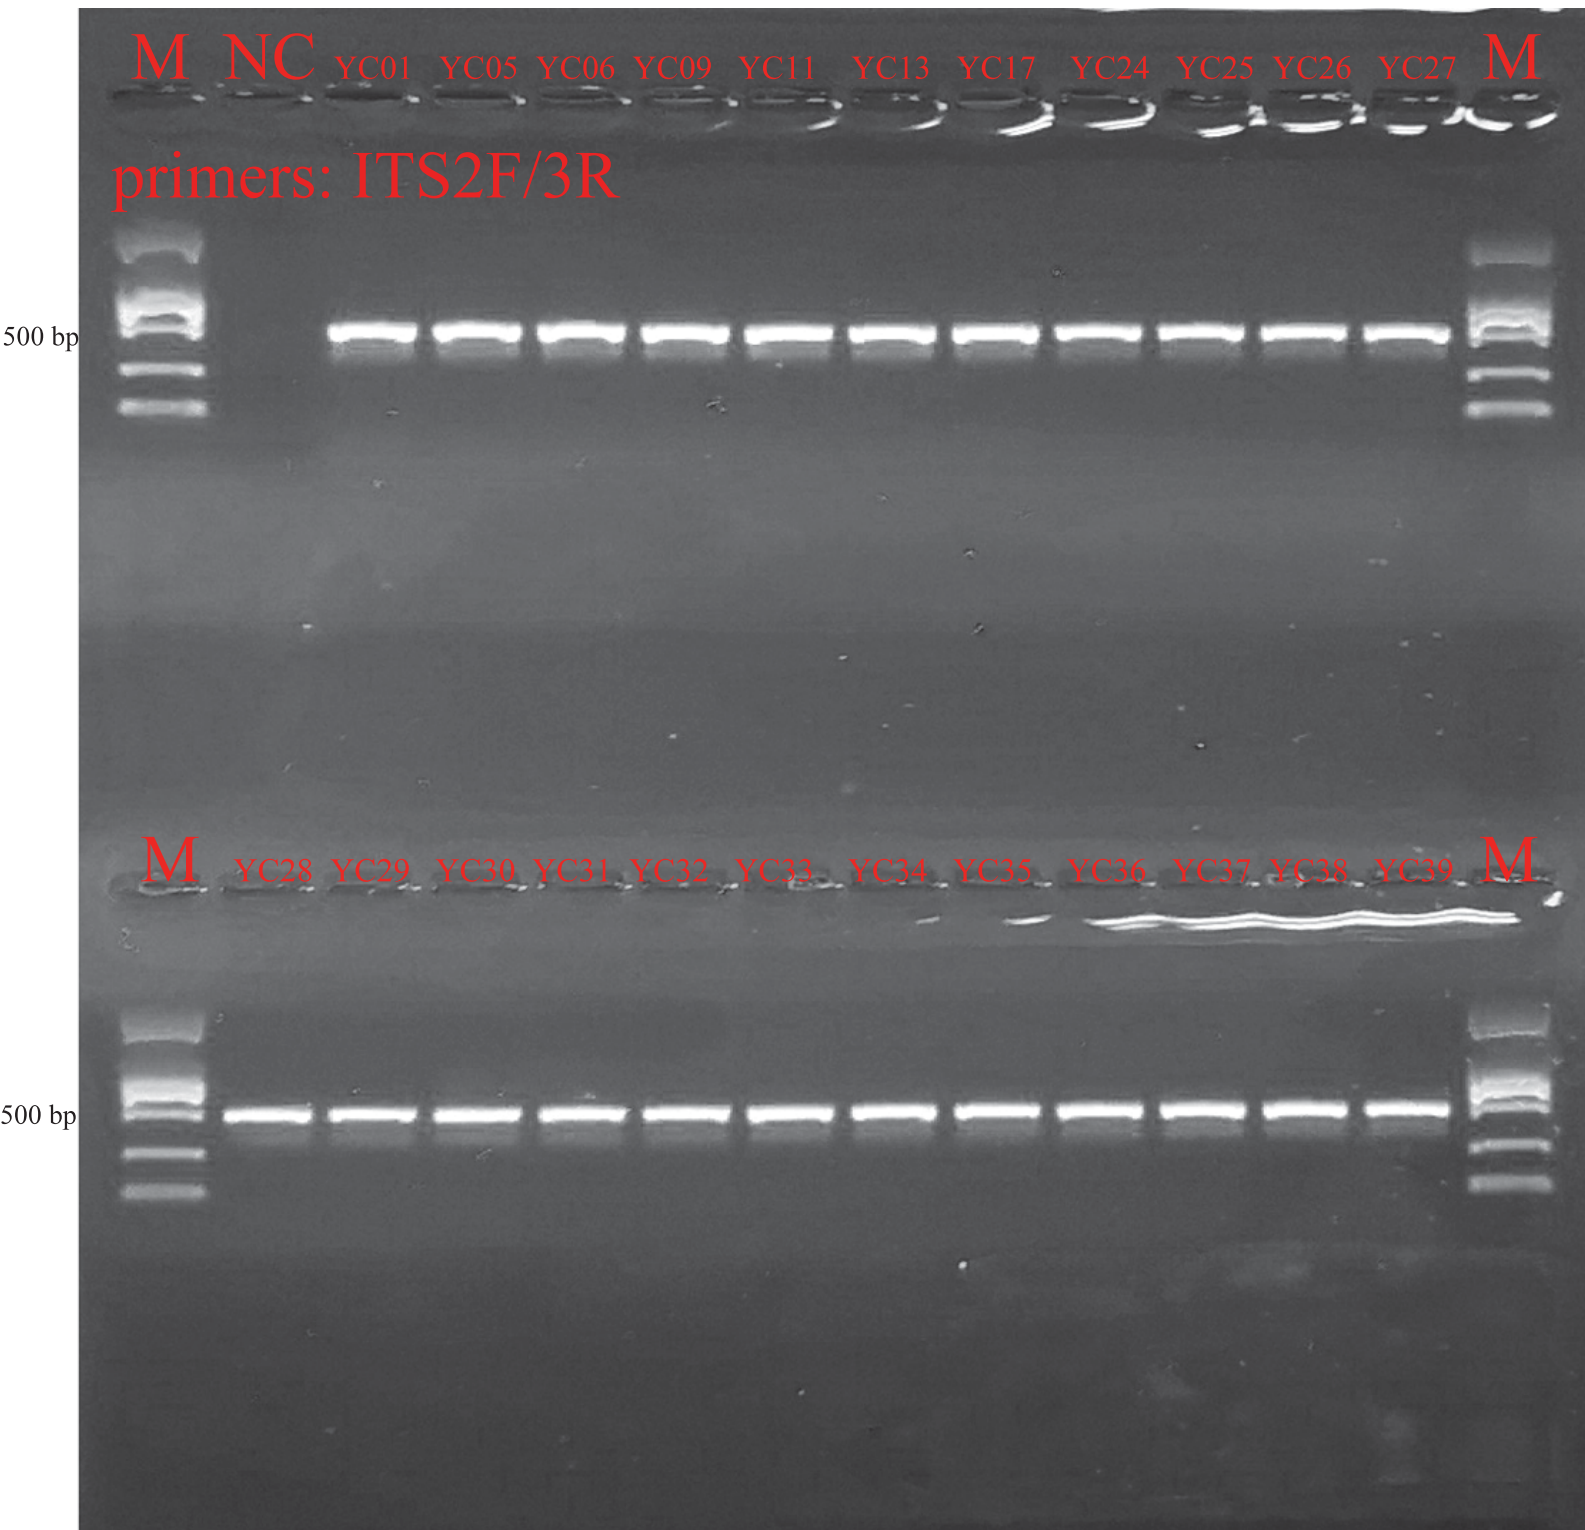

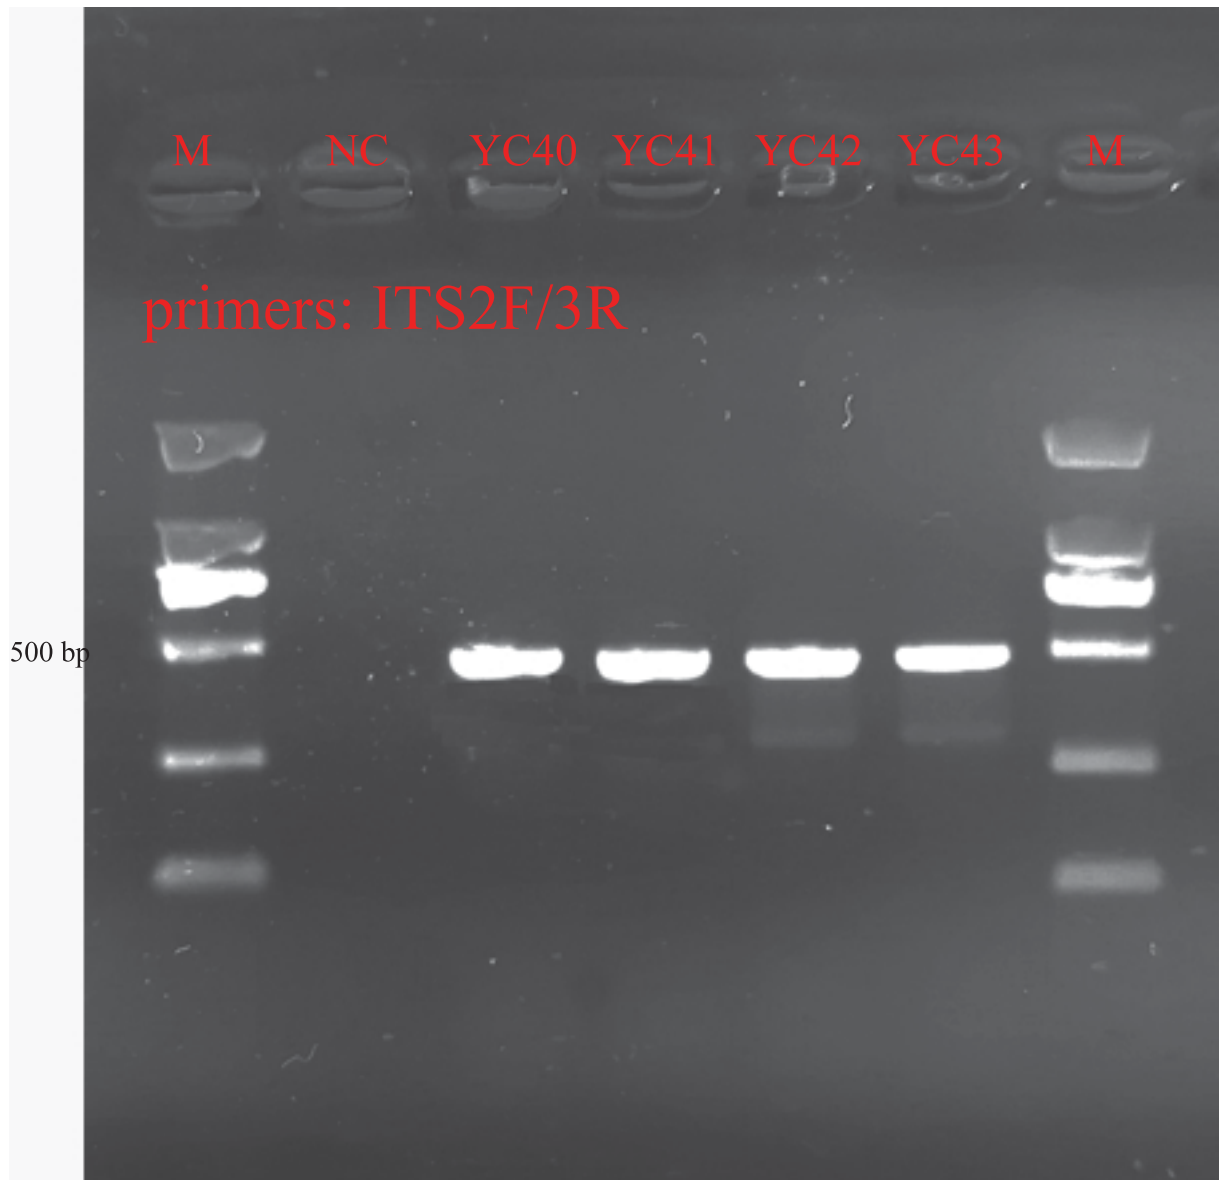



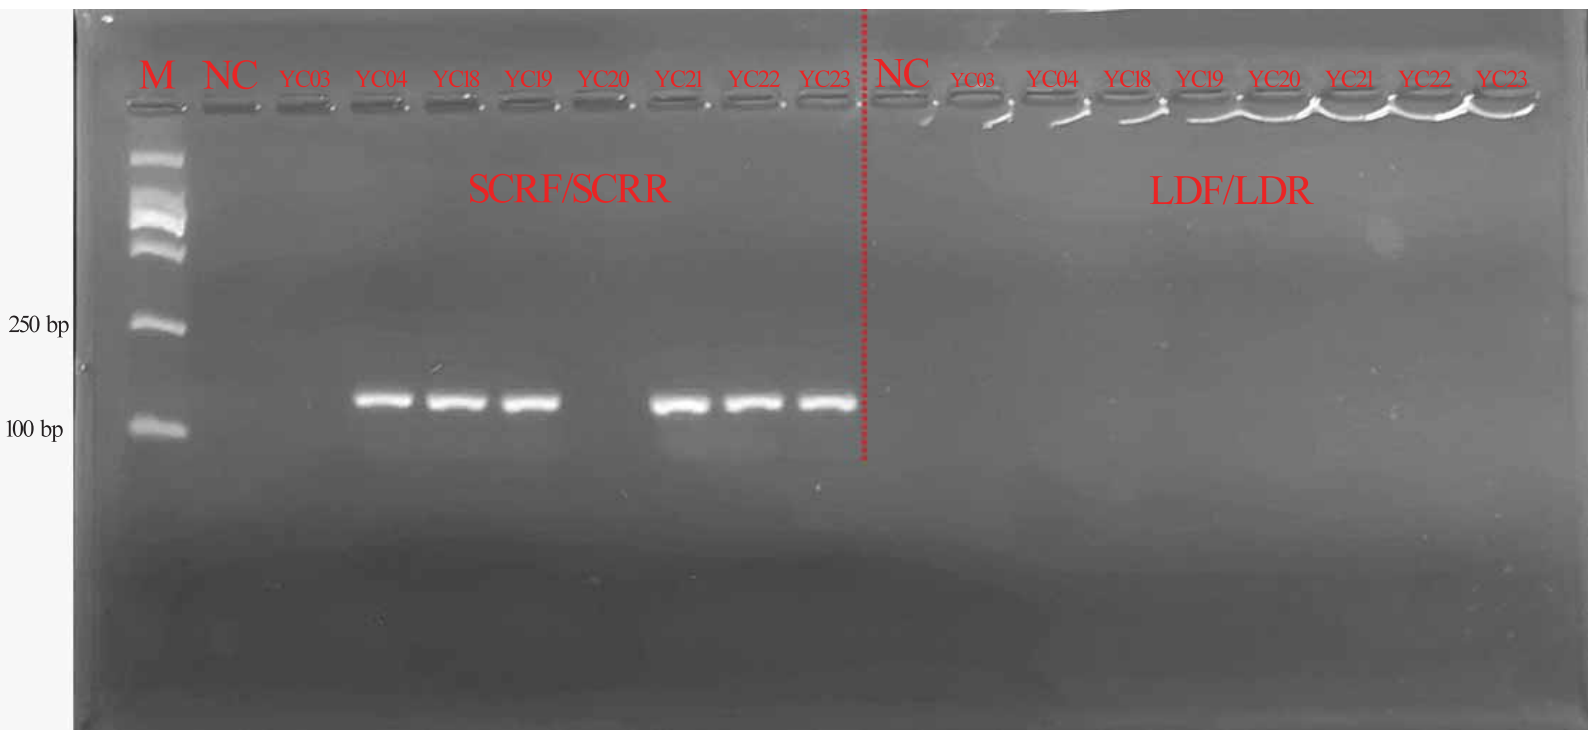

M NC ZCY16 ZCY26 ZCY29 ZCY33 ZCY34 ZCY35 ZCY40 ZCY41 ZCY44 ZCY48 ZCY51 ZCY53 ZCY55 ZCY56 ZCY57 M

primers : SYF1/SYR1

150 bp

M ZCY58 ZCY63 ZCY64 ZCY65 ZCY66 ZCY69 ZCY70 ZCY71 ZCY72 ZCY74 ZCY79 ZCY85 ZCY92 ZCY94 ZCY95 ZCY96 M

150 bp

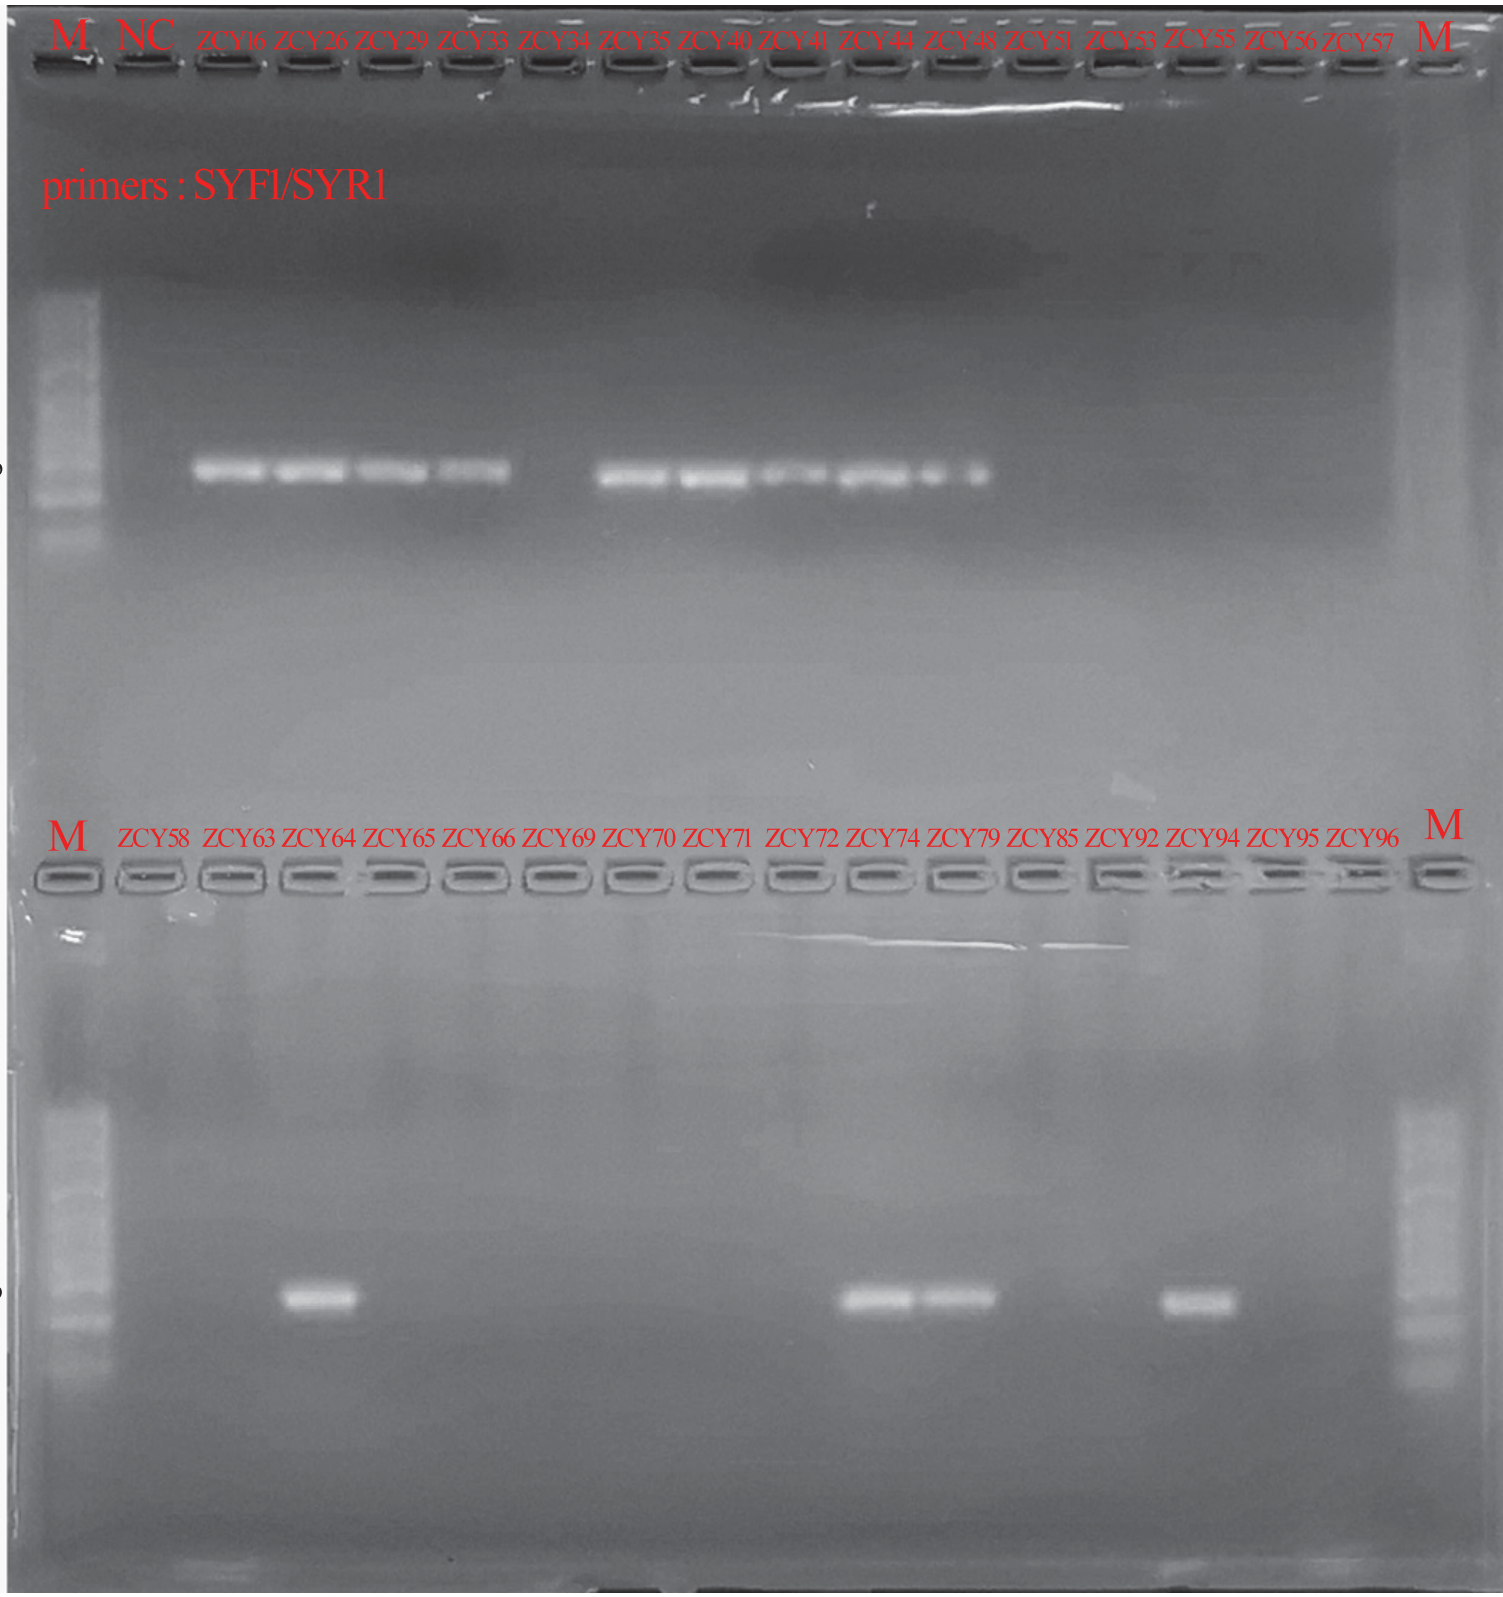

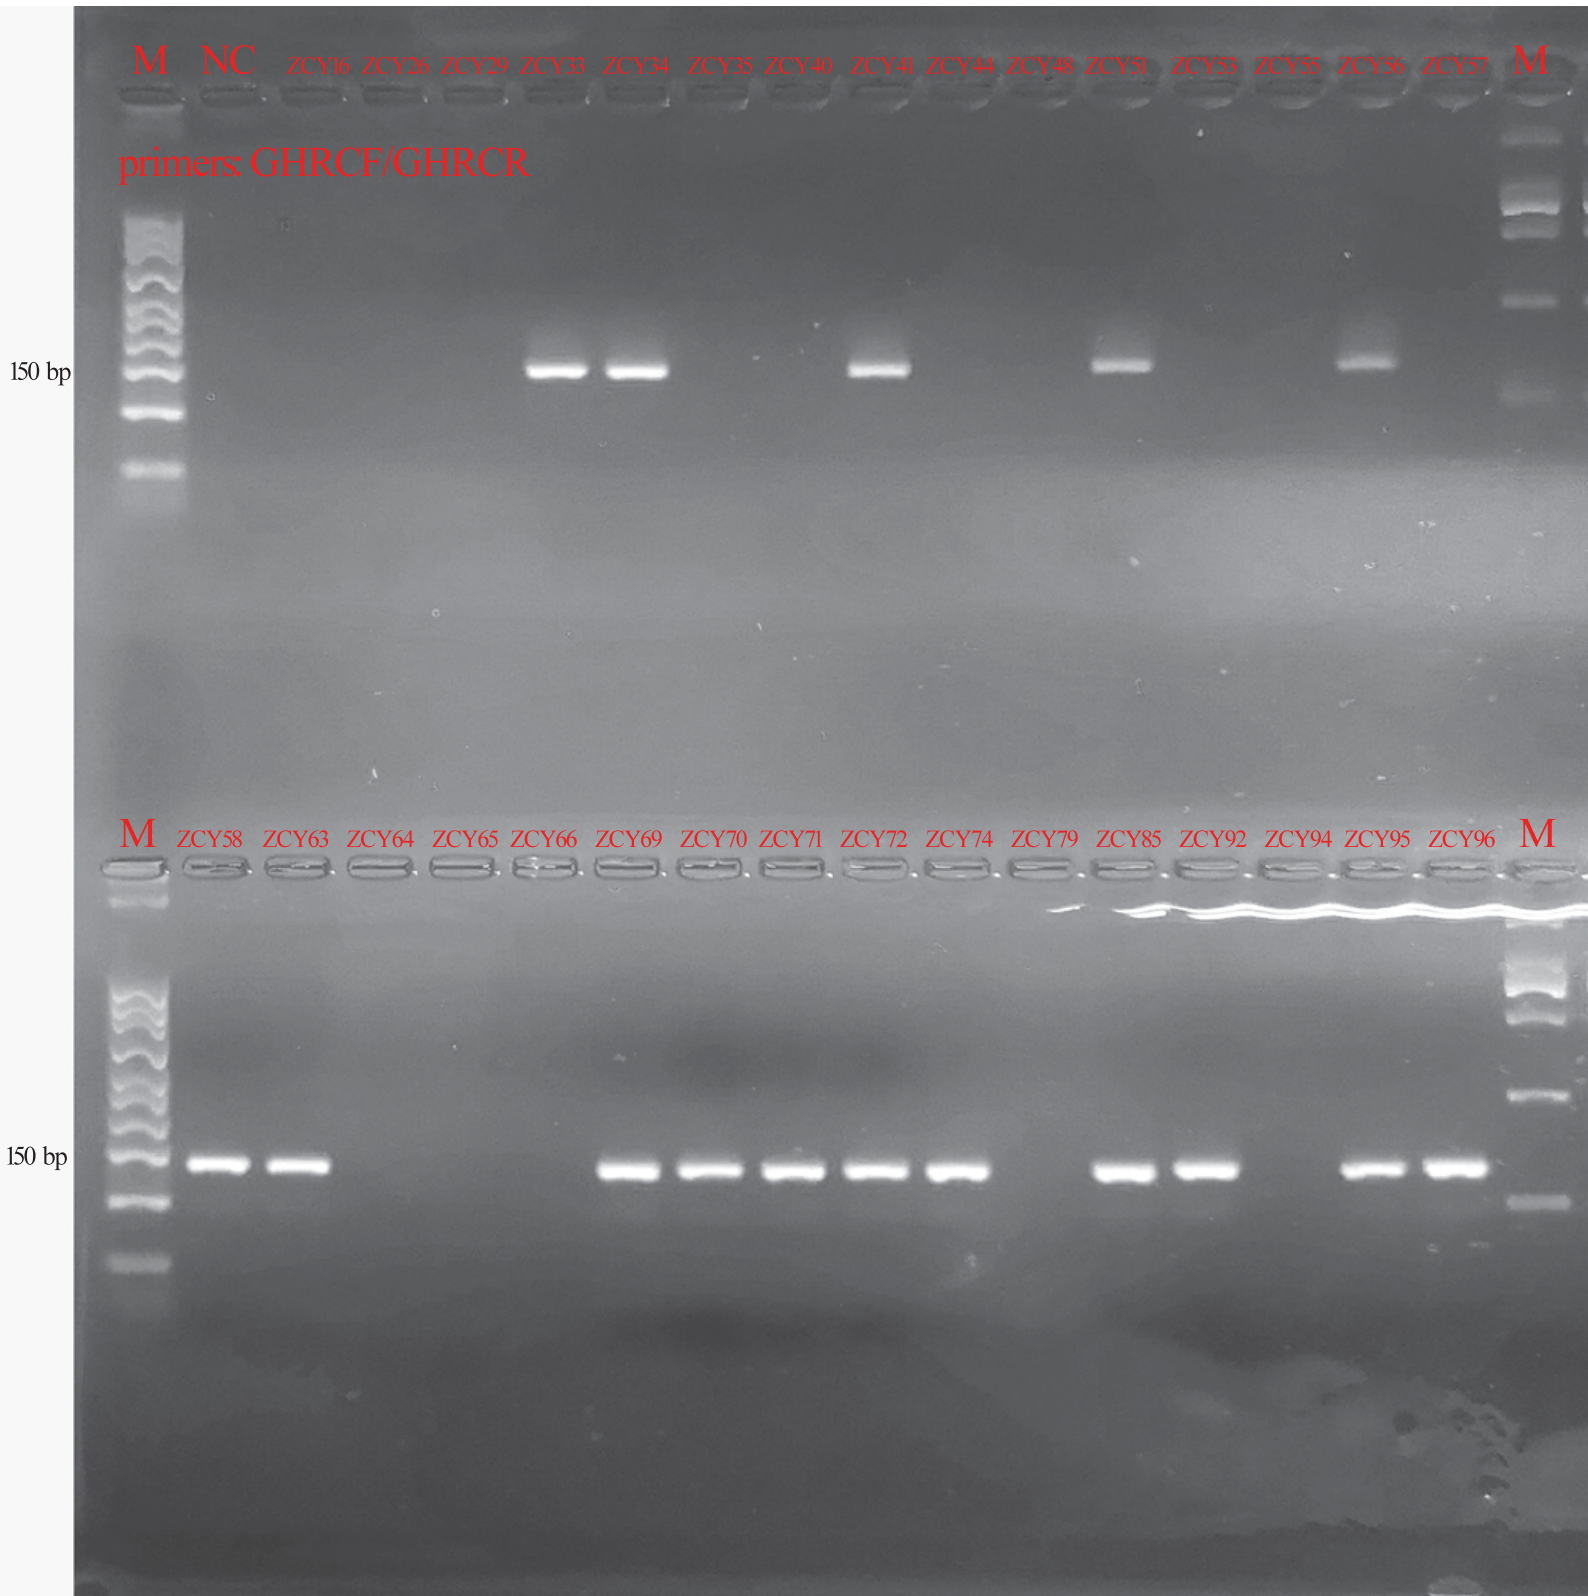

M NC ZCY16 ZCY26 ZCY29 ZCY33 ZCY34 ZCY35 ZCY40 ZCY41 ZCY44 ZCY48 ZCY51 ZCY53 ZCY55 ZCY56 ZCY57 M

primers : HMRCF/HMRCR

150 bp

M ZCY58 ZCY63 ZCY64 ZCY65 ZCY66 ZCY69 ZCY70 ZCY71 ZCY72 ZCY74 ZCY79 ZCY85 ZCY92 ZCY94 ZCY95 ZCY96 M

150 bp

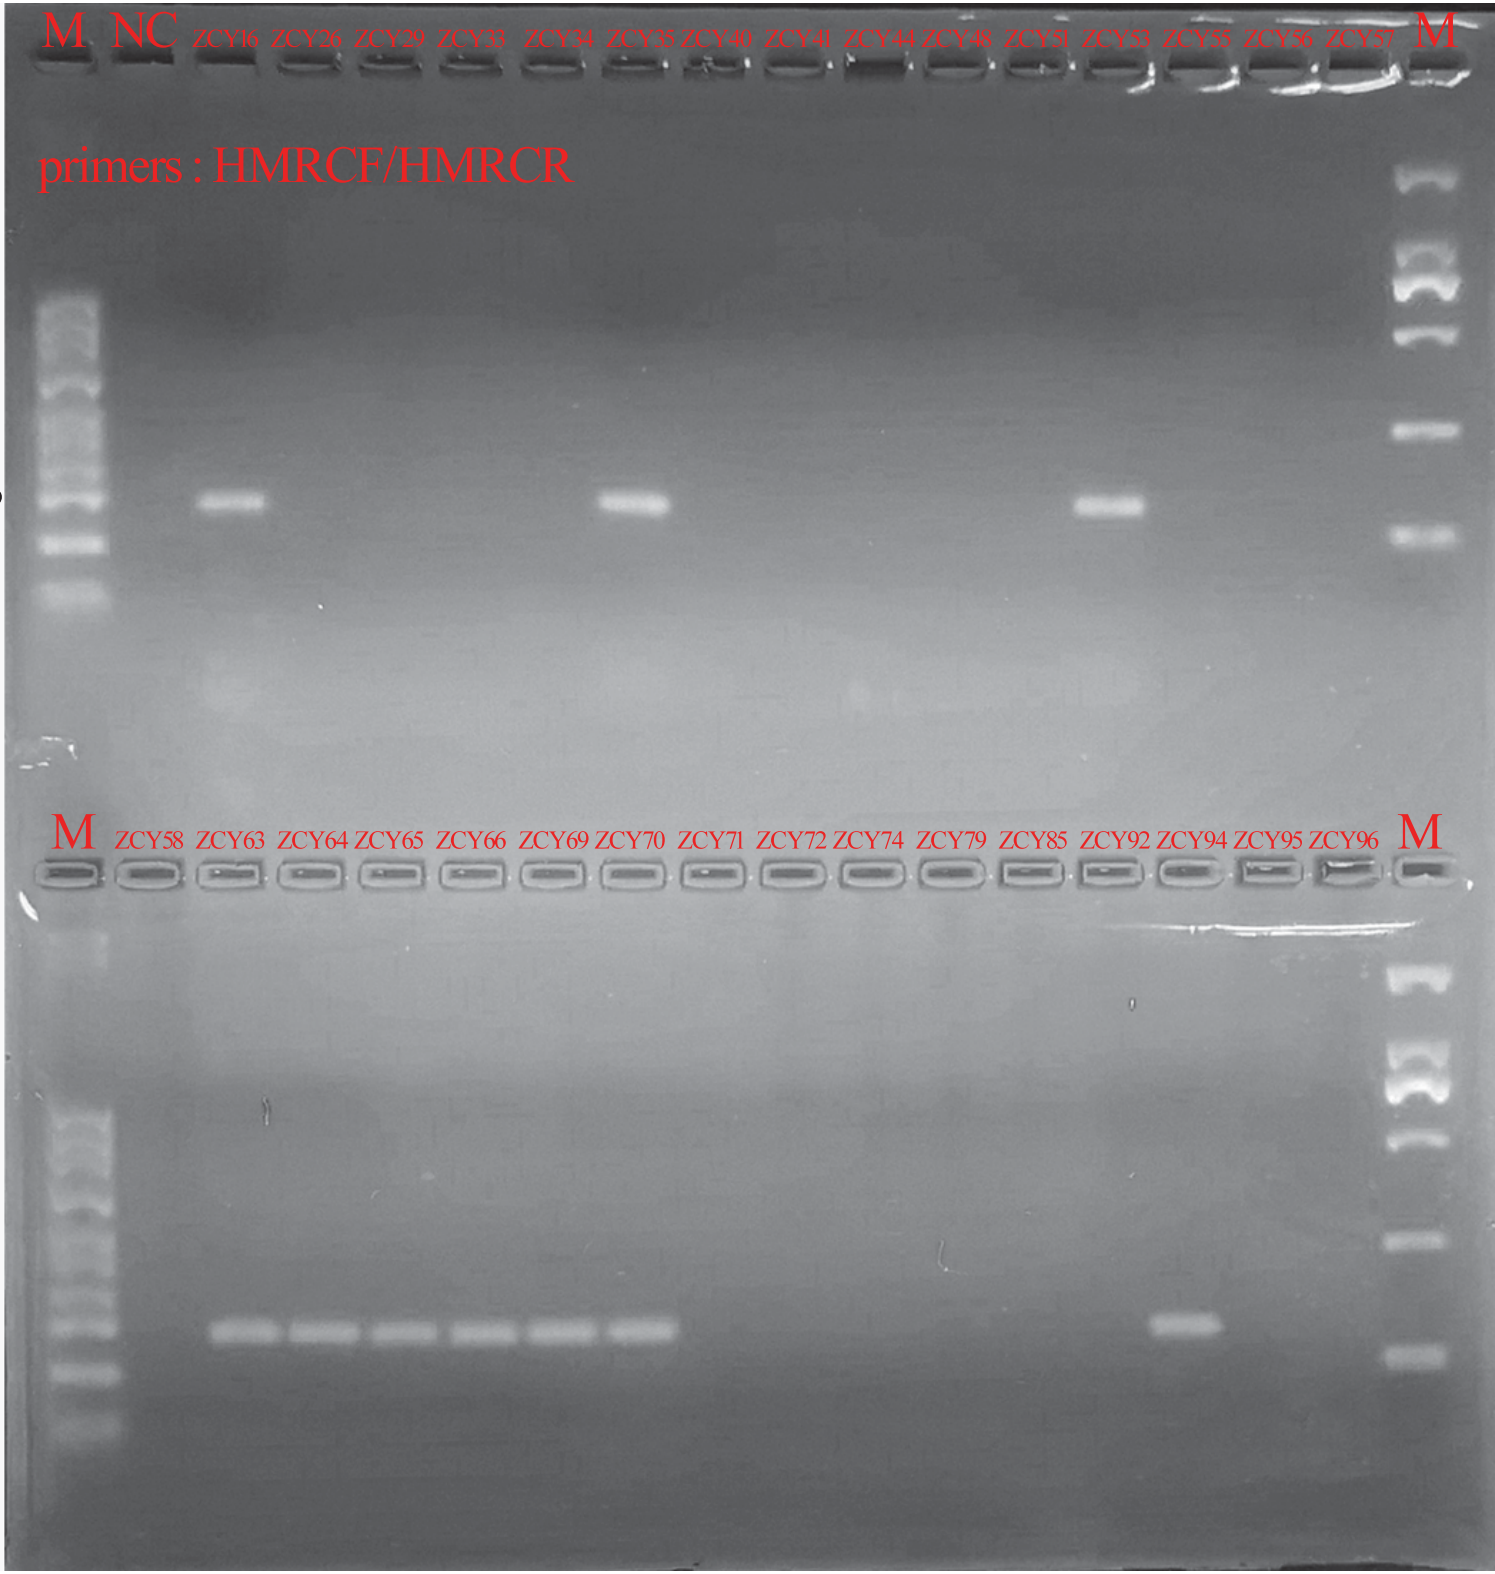

M NC ZCY16 ZCY26 ZCY29 ZCY33 ZCY34 ZCY35 ZCY40 ZCY41 ZCY44 ZCY48 ZCY51 ZCY53 ZCY55 ZCY56 ZCY57 M

primers : SCRF/SCRR

150 bp

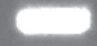

M ZCY58 ZCY63 ZCY64 ZCY65 ZCY66 ZCY69 ZCY70 ZCY71 ZCY72 ZCY74 ZCY79 ZCY85 ZCY92 ZCY94 ZCY95 ZCY96 M

150 bp

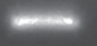



M NC ZCY16 ZCY26 ZCY29 ZCY33 ZCY34 ZCY35 ZCY40 ZCY41 ZCY44 ZCY48 ZCY51 ZCY53 ZCY55 ZCY56 ZCY57 M

primers: CCRF/CCRR

100 bp  
50 bp

M ZCY58 ZCY63 ZCY64 ZCY65 ZCY66 ZCY69 ZCY70 ZCY71 ZCY72 ZCY74 ZCY79 ZCY85 ZCY92 ZCY94 ZCY95 ZCY96 M

100 bp  
50 bp

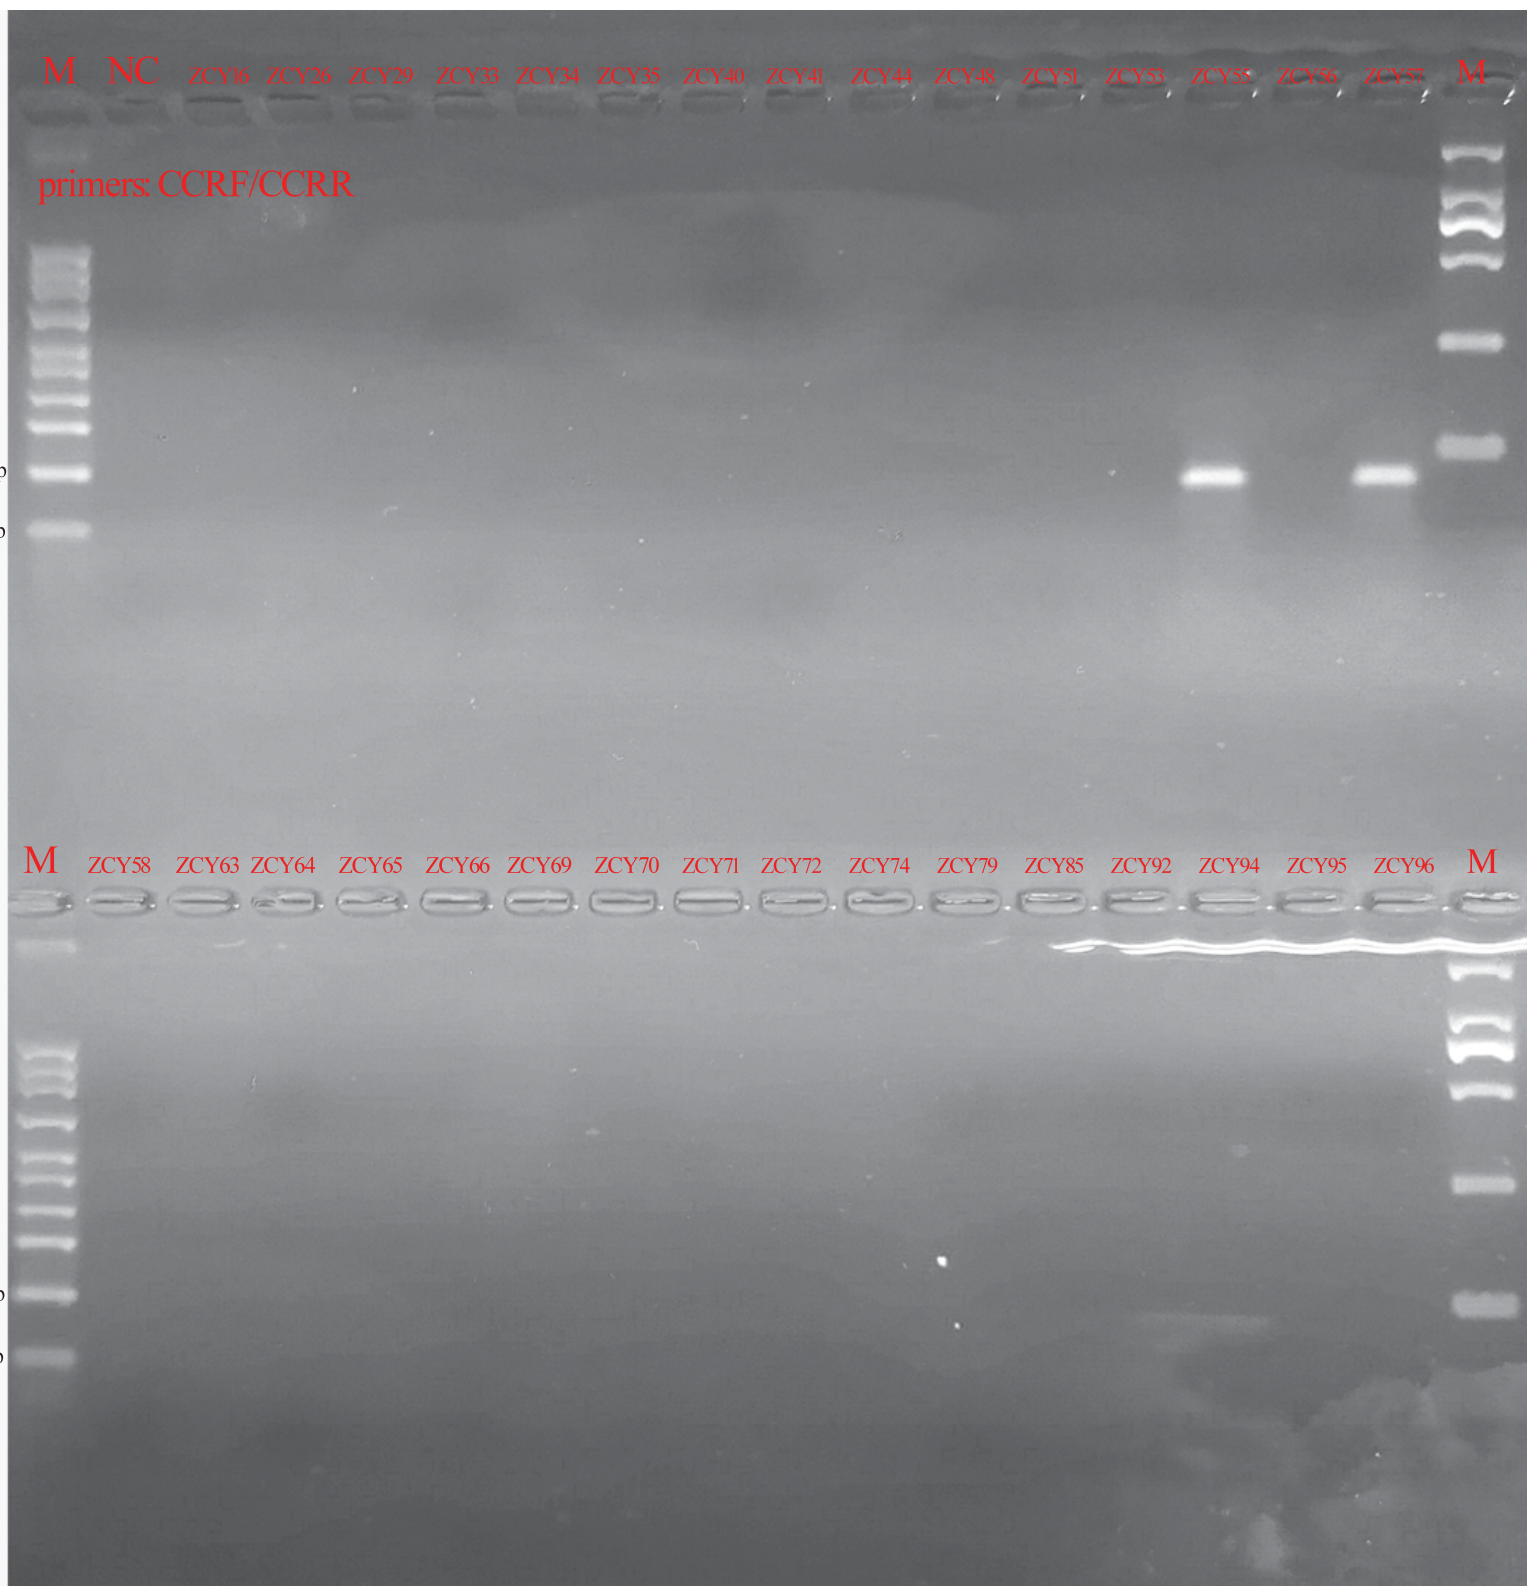

M NC ZCY16 ZCY26 ZCY29 ZCY33 ZCY34 ZCY35 ZCY40 ZCY41 ZCY44 ZCY46 ZCY51 ZCY53 ZCY55 ZCY56 ZCY57 M

primers: LDF/LDR

M ZCY58 ZCY63 ZCY64 ZCY65 ZCY66 ZCY69 ZCY70 ZCY71 ZCY72 ZCY74 ZCY79 ZCY85 ZCY92 ZCY94 ZCY95 ZCY96 M
